# Supplementary material
Source: publisher figshare collection journal article supplement (https://tandf.figshare.com/articles/dataset/_/11854743)

### Probabilities 2007-2011

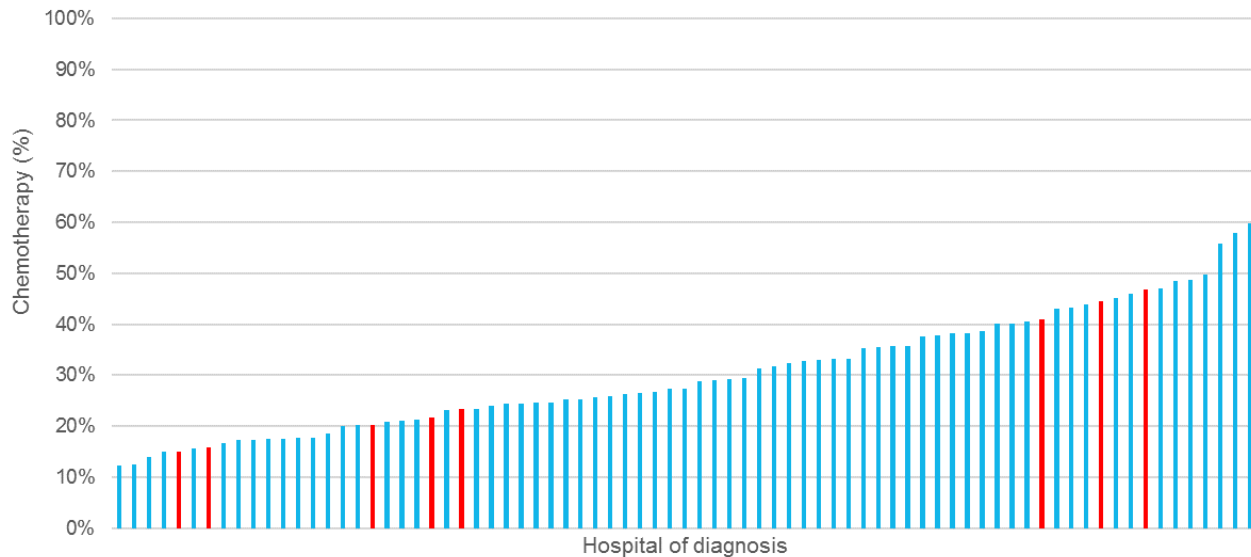

### Probabilities 2012-2016

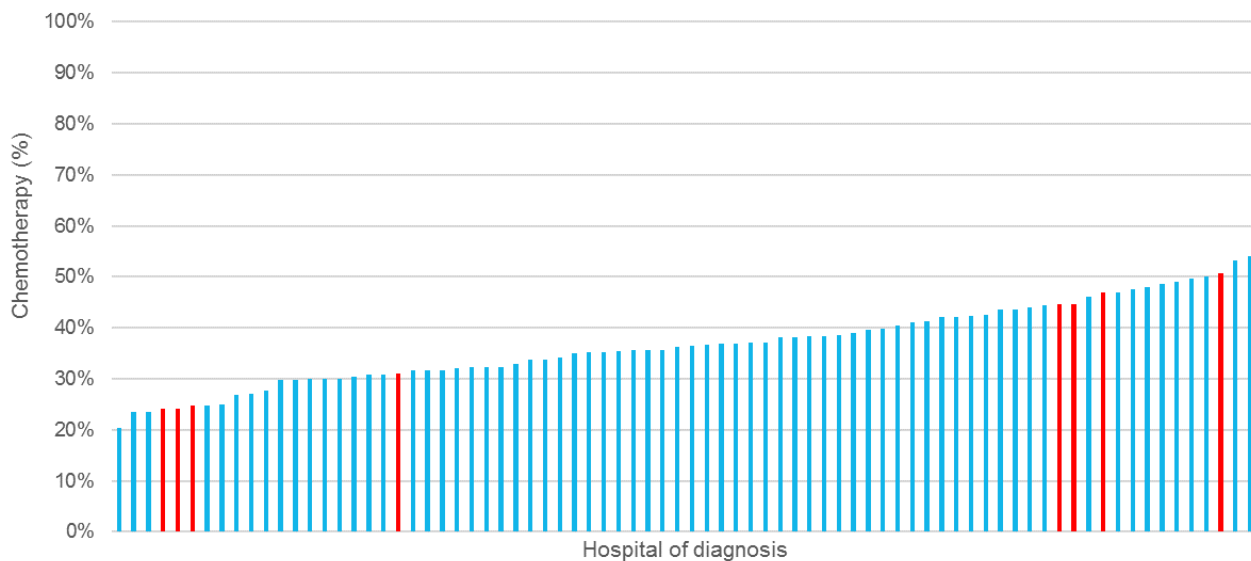

Supplement: Supplementary file 1 [file 1]
